# Supplementary material for: Impact of IoT-Enabled Variable Irrigation and Fertigation Rates on the Growth, Yield, and Economics of Grand Nain Bananas
Source: Research Square preprint supplement (doi:10.21203/rs.3.rs-3015203/v1), 2023-06-26
Supplement: Supplementary file 1 [file b6eede645e470a106724b55d.xlsx]

## Sheet: Parameters
		Total Yd (kg)	Bunch Wt	2nd hand wt	fruits in 2nd hand	fruit wt in 2nd hand	fruits per Bunch	fruit length	fruit Cercumference	delay in flow	Days to flow	days to harvest	Peduncle girth	Hands per Bunch	Total N (%)	Total P (%)	Total K (%)	Total Ca (%)	Total S (%)	Total Mg (%)	Total Fe (ppm)	Total Mn (ppm)	Total Zn (ppm)	Total Cu (ppm)	Total B (ppm)	R-Peel wt	R-Peel %	R-Pulp %	R-TSS	Peel wt	Peel %	Pulp %	TSS	Total Sugars %	Acidity %	Irrigation (L/Plant)	N (g/plant)	P (g/plant)	K (g/plant)
	I1F1	286.95	22.4246	3.76672	17.3687	0.218378	107.667	23.75	13.5208	115.833	335.833	127	19.3333	7.41667	0.943333	0.0736667	1.14667	0.641667	0.213667	0.194	35.0333	17.8667	7.75	7.77	9.05667	52.5311	29.4469	70.5531	23.65	78.5883	37.4559	62.5441	5.61111	0.757778	0.823333	463.333	575.17	159.54	676.17
	I1F2	260.233	26.1613	3.89075	17.2278	0.227778	124.083	22.9167	13.1458	112.444	332.444	133.222	19.3194	8.44444	0.87	0.0733333	1.13333	0.509667	0.22	0.221	33.8333	14.2667	7.16667	6.89	8.03667	53.7272	24.7503	75.2497	24.3167	87.2639	34.328	65.672	6.83333	2.06222	0.788889	468	433.75	125.4	507.13
	I1F3	261.39	23.9052	3.30648	16.9525	0.196867	130.667	22.3125	12.9792	130.667	350.667	128.167	18.4583	9	1.06667	0.075	1.08333	0.572667	0.215667	0.218333	33.6333	13.5333	10.3667	6.58333	9.58667	47.4617	25.5882	69.0131	23.5722	72.3006	36.2509	63.7491	6.14444	1.61556	0.841111	504.667	292.16	91.27	338.08
	I2F1	277.337	25.7766	3.86011	18.4056	0.21275	143.306	22.1667	12.5208	103.167	323.167	138.083	20.5833	9.41667	0.853333	0.0716667	1.46667	0.480667	0.202	0.197333	32.3667	17.9333	7.40667	8.11333	8.83333	46.4404	25.9947	74.0053	25.1033	75.5706	34.2135	65.7865	6.49444	1.13	0.854444	740.667	575.17	159.54	676.17
	I2F2	310.013	28.7847	3.86039	18.1778	0.211678	147	23.125	13.2847	106.389	326.389	133.778	19.8333	9.80556	0.966667	0.084	1.065	0.599333	0.187333	0.205667	33.3667	5.9	8.4	6.93333	8.16333	46.4839	24.5063	75.4937	23.1056	77.1567	34.8122	65.1878	6.01667	2.85444	1.01667	1140	433.75	125.4	507.13
	I2F3	303.047	26.8378	3.97475	18.4217	0.217684	130	23.0833	13.4375	115.167	335.167	122.583	19.625	8.41667	1.13333	0.07	1.05167	0.595333	0.192333	0.255	29.4333	6.95	8.7	7.77	9.38	45.4122	25.2193	74.7807	24.0611	75.5339	32.8218	67.1782	5.71667	1.19111	1.04778	660.667	292.16	91.27	338.08
	I3F1	314.023	28.5476	4.20848	19.3333	0.219394	135.333	24.375	13.4375	105.417	325.417	135.417	20.75	9	0.926667	0.08	1.11667	0.701	0.187333	0.186	30.3667	6.56667	10	8.40333	8.37333	44.6017	24.5224	75.4776	22.8611	72.9117	32.863	67.137	5.52222	3.25556	1.16	1222.33	575.17	159.54	676.17
	I3F2	333.507	29.2837	4.1595	18.2389	0.231378	135.417	25.0208	13.8958	99.5	319.5	130.833	21.0417	8.66667	0.876667	0.075	1.21	0.653333	0.212667	0.209333	31.5	14.1	8.53333	7.84333	9.23	56.9406	27.1868	72.8132	22.3944	87.3378	34.8823	65.1177	5.43889	1.07667	0.857778	1052	433.75	125.4	507.13
	I3F3	378.043	33.2009	4.49733	20.2222	0.223867	155.583	24.3958	13.2708	108.167	328.167	127.083	21.1667	9.75	1.21	0.0866667	0.981667	0.642333	0.215667	0.239	31.2667	2.93333	9.26667	8.5	7.64333	48.7083	25.118	74.882	23.3722	71.1706	31.9688	68.0312	5.45	2.57222	1.20889	1394	292.16	91.27	338.08
	Control	416.117	37.8288	4.78394	19.7879	0.240758	193.417	25.3021	14.6875	38.5	258.5	135.25	21.75	11.3333	0.743333	0.0596667	1.14167	0.8667	0.257333	0.225667	30.4167	4.325	9.64333	7.55	9.85333	44.21	23.7455	76.3995	24.4098	80.8849	34.4491	65.4544	5.01871	1.3535	0.922378	5206	575.17	159.54	676.17

## Sheet: Correlation
	Total Yd (t/ha)	Bunch Wt (kg)	2nd hand wt (kg)	fruits in 2nd hand	fruit wt in 2nd hand (kg)	fruits per Bunch	fruit length (cm)	fruit Cercumference (cm)	delay in flow (days)	Days to flower (days)	days to harvest	Peduncle girth (cm)	Hands per Bunch	Total N (%)	Total P (%)	Total K (%)	Total Ca (%)	Total S (%)	Total Mg (%)	Total Fe (ppm)	Total Mn (ppm)	Total Zn (ppm)	Total Cu (ppm)	Total B (ppm)	Peel wt (g) (Ripen fruit)	Peel % (Ripen fruit)	Pulp % (Ripen fruit)	TSS (Ripen fruit)	Peel wt (UnRipen fruit)	Peel % (UnRipen fruit)	Pulp % (UnRipen fruit)	TSS (UnRipen fruit)	Total Sugars % (UnRipen fruit)	Acidity % (UnRipen fruit)	Irrigation (L/plant)	Nitrogen (g/plant)	Phosphorus (g/plant)	K -Potash (g/plant)
Total Yd (t/ha)	1
Bunch Wt (kg)	0.939345	1
2nd hand wt (kg)	0.91513	0.908782	1
fruits in 2nd hand	0.855421	0.835339	0.885424	1
fruit wt in 2nd hand (kg)	0.689968	0.696825	0.850447	0.518498	1
fruits per Bunch	0.827203	0.92293	0.742522	0.725637	0.488148	1
fruit length (cm)	0.831734	0.721281	0.82092	0.640151	0.790827	0.480655	1
fruit Cercumference (cm)	0.760988	0.684114	0.688809	0.409513	0.751332	0.545412	0.85533	1
delay in flow (days)	-0.793691	-0.832152	-0.801713	-0.591914	-0.757904	-0.852944	-0.651744	-0.776398	1
Days to flower (days)	-0.793691	-0.832152	-0.801713	-0.591914	-0.757904	-0.852944	-0.651744	-0.776398	1	1
days to harvest	0.0635391	0.250964	0.209003	0.163179	0.19639	0.396063	0.0344741	-0.0273909	-0.455199	-0.455199	1
Peduncle girth (cm)	0.843471	0.833703	0.915143	0.872043	0.7334	0.73036	0.755851	0.536166	-0.761444	-0.761444	0.404236	1
Hands per Bunch	0.715174	0.85103	0.615819	0.652445	0.328412	0.975207	0.337663	0.403266	-0.760895	-0.760895	0.482232	0.631216	1
Total N (%)	-0.0952338	-0.190475	-0.223608	0.0774915	-0.477571	-0.283456	-0.238552	-0.382297	0.628293	0.628293	-0.760446	-0.320395	-0.264718	1
Total P (%)	-0.160626	-0.182692	-0.190213	0.0786432	-0.397309	-0.313808	-0.118471	-0.487053	0.59797	0.59797	-0.131886	-0.125815	-0.210308	0.602144	1
Total K (%)	-0.272803	-0.226929	-0.136045	-0.17097	-0.00411608	-0.0272531	-0.271202	-0.29471	-0.140529	-0.140529	0.61159	0.163458	-0.0140715	-0.610196	-0.370703	1
Total Ca (%)	0.833577	0.735686	0.726251	0.597792	0.599707	0.639754	0.854857	0.914843	-0.770184	-0.770184	0.0576875	0.609801	0.531286	-0.28108	-0.348105	-0.323156	1
Total S (%)	0.523687	0.529486	0.452139	0.174147	0.572077	0.559788	0.436782	0.611492	-0.67973	-0.67973	0.109663	0.326039	0.464794	-0.421297	-0.627358	0.00751604	0.539312	1
Total Mg (%)	0.294824	0.32991	0.230339	0.215964	0.167277	0.26022	0.0201395	0.176703	-0.0607208	-0.0607208	-0.623753	-0.00105168	0.180991	0.522247	-0.162647	-0.499595	0.0494248	0.23639	1
Total Fe (ppm)	-0.579155	-0.61079	-0.640427	-0.728831	-0.39213	-0.516534	-0.449957	-0.388277	0.426701	0.426701	0.0525448	-0.621513	-0.425344	-0.112619	0.19769	0.129418	-0.452038	0.0185483	-0.443386	1
Total Mn (ppm)	-0.708198	-0.754039	-0.638882	-0.752844	-0.283486	-0.638138	-0.471683	-0.436578	0.395069	0.395069	0.103436	-0.46473	-0.623448	-0.31929	-0.200749	0.668497	-0.571336	-0.0443615	-0.466622	0.644377	1
Total Zn (ppm)	0.401641	0.374487	0.177749	0.373378	-0.152361	0.38852	0.331699	0.328053	-0.15036	-0.15036	-0.143145	0.145831	0.409627	0.27142	0.0550827	-0.48315	0.568173	0.12656	0.138379	-0.439488	-0.569312	1
Total Cu (ppm)	0.428875	0.284206	0.569013	0.713499	0.338967	0.127478	0.451123	0.0668392	-0.16752	-0.16752	0.0245761	0.670437	0.022041	0.135798	0.173739	0.159307	0.233487	-0.159094	-0.0879499	-0.533176	-0.210176	0.0355496	1
Total B (ppm)	0.0890952	0.00390568	-0.084235	-0.204379	0.0214264	0.163578	0.0896763	0.43915	-0.333864	-0.333864	-0.136158	-0.0536844	0.0877798	-0.32077	-0.791986	0.225888	0.366587	0.410313	0.104451	-0.170592	0.213844	0.291256	-0.236029	1
Peel wt (Ripen fruit)	-0.245154	-0.30904	-0.183683	-0.448888	0.229599	-0.498017	0.132643	-0.000717683	0.280106	0.280106	-0.179445	-0.151176	-0.559953	-0.103869	0.132373	0.0875664	-0.271798	0.107871	-0.122512	0.470755	0.553197	-0.490146	-0.116471	-0.135224	1
Peel % (Ripen fruit)	-0.339589	-0.605604	-0.388751	-0.459724	-0.152247	-0.657476	-0.0493101	-0.132988	0.391237	0.391237	-0.353451	-0.288292	-0.728681	0.038729	0.0397478	0.250929	-0.218944	-0.091643	-0.340646	0.519709	0.706928	-0.386334	0.136292	0.171618	0.612396	1
Pulp % (Ripen fruit)	0.51178	0.676477	0.726309	0.662909	0.602225	0.575479	0.35009	0.299366	-0.567561	-0.567561	0.404694	0.632302	0.547324	-0.229428	-0.0443389	-0.0647458	0.291852	0.0143718	0.200611	-0.574941	-0.632618	-0.106619	0.312266	-0.374085	-0.360333	-0.695185	1
TSS (Ripen fruit)	-0.142487	-0.0353719	-0.0250331	-0.0657026	0.0102882	0.196644	-0.468094	-0.235145	-0.228418	-0.228418	0.228115	-0.0679475	0.195933	-0.252389	-0.575249	0.478777	-0.253386	0.323345	0.200907	0.0533502	0.245536	-0.395044	-0.0962392	0.183525	-0.334964	-0.164997	0.155052	1
Peel wt (UnRipen fruit)	-0.0212114	0.0556374	0.125036	-0.313735	0.602861	-0.0621764	0.265495	0.380029	-0.284944	-0.284944	0.202237	0.0930902	-0.140715	-0.62462	-0.388361	0.237308	0.0257241	0.358095	-0.0562642	0.19098	0.352525	-0.532533	-0.291734	0.12547	0.697898	0.159421	0.136679	-0.0248826	1
Peel % (UnRipen fruit)	-0.399201	-0.518014	-0.564725	-0.732683	-0.27588	-0.379585	-0.207828	0.0265565	0.141319	0.141319	-0.0234467	-0.518808	-0.356219	-0.340738	-0.256062	0.217682	-0.0683771	0.216751	-0.443231	0.775699	0.671737	-0.18724	-0.550481	0.449933	0.375742	0.636071	-0.723832	-0.0015367	0.279284	1
Pulp % (UnRipen fruit)	0.385737	0.503915	0.552443	0.724155	0.264473	0.364143	0.197829	-0.0410798	-0.123803	-0.123803	0.0178582	0.508636	0.342292	0.350669	0.269162	-0.217705	0.0536611	-0.231622	0.439813	-0.769253	-0.664432	0.181637	0.551151	-0.459084	-0.368839	-0.628412	0.716595	-0.00436167	-0.282618	-0.999825	1
TSS (UnRipen fruit)	-0.820646	-0.617972	-0.666241	-0.649023	-0.469582	-0.473763	-0.848537	-0.787353	0.546213	0.546213	0.216222	-0.615133	-0.339894	-0.0271116	0.136952	0.350542	-0.888723	-0.306666	-0.124238	0.531377	0.546654	-0.565174	-0.472773	-0.329739	0.18614	-0.0244351	-0.140265	0.424282	0.142451	0.142069	-0.132341	1
Total Sugars % (UnRipen fruit)	0.105107	0.249469	0.168677	0.36343	-0.107177	0.155438	0.0755907	-0.146728	0.100937	0.100937	0.275357	0.119575	0.275583	0.229551	0.666622	-0.447967	0.0551119	-0.389222	-0.146296	-0.149427	-0.603647	0.34155	0.0778614	-0.703055	-0.337972	-0.607232	0.466424	-0.386614	-0.352926	-0.519221	0.522372	0.0373429	1
Acidity % (UnRipen fruit)	0.476494	0.443515	0.476148	0.761532	0.0394937	0.290938	0.325589	0.0578358	-0.0252192	-0.0252192	-0.162782	0.41563	0.288962	0.553767	0.530554	-0.521146	0.296566	-0.364652	0.235433	-0.619419	-0.816207	0.479954	0.584376	-0.453346	-0.50617	-0.43016	0.484415	-0.350694	-0.622868	-0.7743	0.775345	-0.459167	0.676539	1
Irrigation (L/plant)	0.836863	0.86651	0.767789	0.615038	0.643947	0.902432	0.642397	0.795431	-0.960247	-0.960247	0.335017	0.681565	0.826247	-0.471417	-0.548201	-0.0558114	0.845821	0.722118	0.160008	-0.437339	-0.528039	0.37319	0.0891029	0.368344	-0.399074	-0.471471	0.482788	0.178321	0.109925	-0.141992	0.123784	-0.618082	-0.0193863	0.121801	1
Nitrogen (g/plant)	0.0954905	0.0663664	0.251008	0.102811	0.346348	0.129142	0.249643	0.234722	-0.490972	-0.490972	0.702753	0.367776	0.105624	-0.812688	-0.360746	0.597031	0.299136	0.161598	-0.744611	0.120967	0.286808	-0.262572	0.26278	0.119691	-0.0719668	0.167798	0.207388	0.20952	0.244059	0.274936	-0.281588	-0.1134	-0.0994056	-0.248413	0.33886	1
Phosphorus (g/plant)	0.0955598	0.0663767	0.251042	0.102947	0.346253	0.129197	0.249624	0.234702	-0.490986	-0.490986	0.702643	0.367798	0.105661	-0.812552	-0.360829	0.597019	0.299229	0.161644	-0.744545	0.120841	0.286749	-0.262384	0.262952	0.119819	-0.0722108	0.167814	0.207303	0.209659	0.243753	0.27488	-0.281534	-0.113538	-0.0994726	-0.248281	0.338929	1	1
K -Potash (g/plant)	0.0955435	0.0663743	0.251034	0.102915	0.346275	0.129184	0.249628	0.234707	-0.490983	-0.490983	0.702669	0.367792	0.105652	-0.812584	-0.36081	0.597022	0.299207	0.161633	-0.744561	0.120871	0.286763	-0.262428	0.262911	0.119789	-0.0721533	0.167811	0.207323	0.209626	0.243825	0.274893	-0.281547	-0.113505	-0.0994568	-0.248312	0.338912	1	1	1
